# Supplementary material
Source: PubMed Central journal article supplement (PMC3061242)
Supplement: NIHMS222460-supplement-supp.pdf [file NIHMS222460-supplement-supp.pdf]

**Web-based Supplementary Materials for  
 “Improved Doubly Robust Estimation when Data are Monotonely  
 Coarsened, with Application to Longitudinal Studies  
 with Dropout”**

Anastasios A. Tsiatis\*, Marie Davidian, and Weihua Cao,

Department of Statistics, North Carolina State University, Raleigh, North Carolina 27695-8203, U.S.A.

\**email*: tsiatis@stat.ncsu.edu

**Web Appendix A: Derivation of Approximate Standard Errors Via the Sandwich Method**

Throughout, we use the notation defined in the main paper. We provide expressions required to calculate the asymptotic variances of the three estimators for  $\beta$  ( $p \times 1$ ) considered in the main paper:  $\widehat{\beta}_{ipw}$ ,  $\widehat{\beta}_{br*}$ , and  $\widehat{\beta}_{opt*}$ . Let  $\tau$  be the collection of unknown parameters involved in obtaining the estimators for  $\beta$ ; in particular,  $\tau = (\psi^T, \beta^T)^T$  for  $\widehat{\beta}_{ipw}$ ,  $\tau = (\psi^T, \xi_1^T, \dots, \xi_M^T, \beta^T)^T$  for  $\widehat{\beta}_{br*}$ , and  $\tau = (\psi^T, \xi^T, \theta^T, \beta^T)^T$  for  $\widehat{\beta}_{opt*}$ . The estimator for  $\tau$ ,  $\widehat{\tau}$ , in each case can be obtained by solving a set of M-estimating equations given by  $\sum_{i=1}^n \rho_i(\tau) = 0$  (Stefanski and Boos, 2002), where the last  $p$  entries of  $\rho_i(\tau)$  correspond to the estimating equation for  $\beta$ , and  $\rho_i(\tau)$  is defined for each estimator below. Let  $A_n = n^{-1} \sum_{i=1}^n A_i = n^{-1} \sum_{i=1}^n \partial/\partial\tau\{\rho_i(\tau)\}$ , and  $B_n = n^{-1} \sum_{i=1}^n \rho_i(\tau)\rho_i^T(\tau)$ . Following standard theory, the asymptotic covariance matrix of  $\widehat{\tau}$  can be approximated by the empirical sandwich matrix  $V_n = n^{-1}A_n^{-1}B_n(A_n^{-1})^T$ . Therefore, the asymptotic variances of the three estimators can be approximated by the lower, rightmost diagonal ( $p \times p$ ) submatrix of the corresponding matrix  $V_n$ . We present the form of  $\rho_i(\tau)$  and  $A_i$  for each of the estimators, from which the form of  $V_n$  may be calculated. The desired diagonal submatrix of  $V_n$  may then be obtained numerically, with the required matrix inversion carried out by standard routines.

Throughout, we assume that  $\lambda_r \{G_r(Z), \psi_r\}$ ,  $r = 1, \dots, M$ , are logistic regression models, and  $\psi = (\psi_1^T, \dots, \psi_M^T)^T$  are estimated via separate ML fits for each  $r = 1, \dots, M$ , where  $\widetilde{X}_{i,r}$

is a row vector consisting of the covariates used in the modeling of  $\lambda_r \{G_r(Z_i), \psi_r\}$ , including a “1” for the intercept term. For  $\hat{\beta}_{ipw}$ ,  $\rho_i(\tau)$  is given by

$$\begin{aligned} \rho_i(\tau) &= \left( \begin{array}{c} \sum_{r=1}^M \frac{dM_C \{r, G_r(Z_i), \psi\}}{K_r \{G_r(Z_i), \psi\}} \frac{K_{r-1} \{G_r(Z_i), \psi\} \lambda_r \psi \{G_r(Z_i), \psi\}}{\lambda_r \{G_r(Z_i), \psi\}} \\ \frac{I(C_i = \infty)m(Z_i, \beta)}{\pi(\infty, Z_i, \psi)} \end{array} \right) \\ &= \left( \begin{array}{c} dM_C \{1, G_1(Z_i), \psi_1\} \tilde{X}_{i,1}^T \\ \vdots \\ dM_C \{M, G_M(Z_i), \psi_M\} \tilde{X}_{i,M}^T \\ \frac{I(C_i = \infty)m(Z_i, \beta)}{\pi(\infty, Z_i, \psi)} \end{array} \right), \end{aligned}$$

and  $A_i$  is given by

$$A_i = \left( \begin{array}{cccccc} D_{i,1} & 0 & \cdots & \cdots & \cdots & 0 \\ 0 & \ddots & 0 & \cdots & \cdots & 0 \\ 0 & 0 & D_{i,r} & 0 & \cdots & 0 \\ 0 & \cdots & 0 & \ddots & 0 & 0 \\ 0 & \cdots & \cdots & 0 & D_{i,M} & 0 \\ E_{i,1} & \cdots & E_{i,r} & \cdots & E_{i,M} & D_{i,\beta} \end{array} \right),$$

where

$$\begin{aligned} D_{i,r} &= -I(C_i \geq r) \lambda_r \{G_r(Z_i), \psi_r\} [1 - \lambda_r \{G_r(Z_i), \psi_r\}] \tilde{X}_{i,r}^T \tilde{X}_{i,r}, \quad r = 1, \dots, M, \\ E_{i,r} &= \frac{I(C_i = \infty)m(Z_i, \beta)}{\pi(\infty, Z_i, \psi)} \lambda_r \{G_r(Z_i), \psi_r\} \tilde{X}_{i,r}, \quad r = 1, \dots, M, \\ D_{i,\beta} &= \frac{I(C_i = \infty)}{\pi(\infty, Z_i, \psi)} m_\beta(Z_i, \beta), \end{aligned}$$

and  $m_\beta(Z_i, \beta)$  is a column vector of partial derivatives of  $m(Z_i, \beta)$  with respect to  $\beta$ .

We implemented  $\widehat{\beta}_{br^*}$  as described in Bang and Robins (2005); i.e., we added as a covariate  $\widehat{K}_r^{-1} \{G_r(Z), \widehat{\psi}_1, \dots, \widehat{\psi}_r\}$  in the conditional mean functions  $h_r^* \{G_r(Z), \xi_r\}$  corresponding to a generalized linear model with canonical link, where  $\widehat{K}_r^{-1} \{G_r(Z), \widehat{\psi}_1, \dots, \widehat{\psi}_r\}$  is an estimate for the true cumulative hazard  $K_r^{-1} \{G_r(Z), \psi_1, \dots, \psi_r\}$ ,  $r = 1, \dots, M$ . We write the new conditional mean function including additional covariate  $\widehat{K}_r^{-1} \{G_r(Z), \widehat{\psi}_1, \dots, \widehat{\psi}_r\}$  as  $h_r^* \{G_r(Z), \psi_1, \dots, \psi_r, \xi_r, \beta\}$ . For this estimator,  $\rho_i(\tau)$  is given by

$$\rho_i(\tau) = \begin{pmatrix} dM_C \{1, G_1(Z_i), \psi_1\} \widetilde{X}_{i,1}^T \\ \vdots \\ dM_C \{M, G_M(Z_i), \psi_M\} \widetilde{X}_{i,M}^T \\ I(C_i > 1) [h_2^* \{G_2(Z_i), \psi_1, \psi_2, \xi_2, \beta\} - h_1^* \{G_1(Z_i), \psi_1, \xi_1, \beta\}] \\ \quad \times h_{1, \psi_1, \xi_1}^* \{G_1(Z_i), \psi_1, \xi_1, \beta\} \\ \quad \vdots \\ I(C_i > M) [m(Z_i, \beta) - h_M^* \{G_M(Z_i), \psi, \xi_M, \beta\}] \\ \quad \times h_{M, \psi, \xi_M}^* \{G_M(Z_i), \psi, \xi_M, \beta\} \\ h_1^* \{G_1(Z_i), \psi_1, \xi_1, \beta\} \end{pmatrix},$$

where  $h_{r, \psi_1, \dots, \psi_r, \xi_r}^* \{G_r(Z_i), \psi_1, \dots, \psi_r, \xi_r, \beta\}$  is the column vector of partial derivatives of  $h_r^* \{G_r(Z_i), \psi_1, \dots, \psi_r, \xi_r, \beta\}$  with respect to  $\psi_1, \dots, \psi_r, \xi_r$ ,  $r = 1, \dots, M$ .

The matrix  $A_i$  is given by

$$A_i = \begin{pmatrix} A_{1i} \\ A_{2i} \\ A_{3i} \end{pmatrix}, \quad A_{1i} = \begin{pmatrix} D_{i,1} & 0 & \cdots & \cdots & \cdots & 0 \\ 0 & \ddots & 0 & \cdots & \cdots & 0 \\ 0 & 0 & D_{i,r} & 0 & \cdots & 0 \\ 0 & \cdots & 0 & \ddots & 0 & 0 \\ 0 & \cdots & \cdots & 0 & D_{i,M} & 0 \end{pmatrix},$$

$$\text{and } A_{3i} = \begin{pmatrix} F_{1,i} & 0 & \cdots & 0 & F_{2,i} & 0 & \cdots & 0 & F_{3,i} \end{pmatrix},$$

where

$$\begin{aligned} D_{i,r} &= -I(C_i \geq r) \lambda_r \{G_r(Z_i), \psi_r\} [1 - \lambda_r \{G_r(Z_i), \psi_r\}] \tilde{X}_{i,r}^T \tilde{X}_{i,r}, \quad r = 1, \dots, M, \\ F_{1,i} &= h_{1,\psi_1}^* \{G_1(Z_i), \psi_1, \xi_1, \beta\}, \quad F_{2,i} = h_{1,\xi_1}^* \{G_1(Z_i), \psi_1, \xi_1, \beta\}, \\ F_{3,i} &= h_{1,\beta}^* \{G_1(Z_i), \psi_1, \xi_1, \beta\}; \end{aligned}$$

i.e.,  $F_{1,i}, F_{2,i}, F_{3,i}$  are partial derivatives of  $h_1^* \{G_1(Z_i), \psi_1, \xi_1, \beta\}$  with respect to  $\psi_1, \xi_1$ , and  $\beta$ , respectively. The  $A_{2i}$  term involves the partial derivatives of the column vector

$$\rho_{2,i}(\tau) = \begin{pmatrix} I(C_i > 1) [h_2^* \{G_2(Z_i), \psi_1, \psi_2, \xi_2, \beta\} - h_1^* \{G_1(Z_i), \psi_1, \xi_1, \beta\}] \\ \quad \times h_{1,\psi_1, \xi_1}^* \{G_1(Z_i), \psi_1, \xi_1, \beta\} \\ \quad \vdots \\ I(C_i > M) [m(Z_i, \beta) - h_M^* \{G_M(Z_i), \psi, \xi_M, \beta\}] \\ \quad \times h_{M,\psi, \xi_M}^* \{G_M(Z_i), \psi, \xi_M, \beta\} \end{pmatrix}$$

with respect to  $\tau$ . Often in practice, it is cumbersome to obtain the analytical derivatives of  $\rho_{2,i}(\tau)$  with respect to  $\tau$ . In our implementation, we used numerical derivatives as an approximation to the analytical derivatives. For example, to calculate the derivative of  $\rho_{2,i}(\tau)$  with respect to the  $k$ th element of  $\tau$ , we used a one-sided numerical approximation of the form  $\{\rho_{2,i}(\tau + \epsilon \mathbf{1}_k) - \rho_{2,i}(\tau)\} / \epsilon$  for small enough  $\epsilon > 0$ , where  $\mathbf{1}_k$  is a column vector with 1 on the  $k$ th entry and all other entries 0.

For  $\widehat{\beta}_{opt^*}$ ,  $\rho_i(\tau)$  is given by

$$\rho_i(\tau) = \begin{pmatrix} dM_C \{1, G_1(Z_i), \psi_1\} \widetilde{X}_{i,1}^T \\ \vdots \\ dM_C \{M, G_M(Z_i), \psi_M\} \widetilde{X}_{i,M}^T \\ \sum_{r=1}^M I(C_i > r) \widetilde{q}_r \{G_r(Z_i), \widetilde{\xi}, \psi\} \left[ \widetilde{h}_{r+1} \{G_{r+1}(Z_i), \widetilde{\xi}, \psi\} - \widetilde{h}_r \{G_r(Z_i), \widetilde{\xi}, \psi\} \right] \\ \frac{I(C_i = \infty) m(Z_i, \beta)}{\pi(\infty, Z_i, \psi)} + \sum_{r=1}^M \frac{dM_C \{r, G_r(Z_i), \psi\}}{K_r \{G_r(Z_i), \psi\}} h_r \{G_r(Z_i), \xi\} \end{pmatrix},$$

where

$$\begin{aligned} \widetilde{h}_r \{G_r(Z_i), \widetilde{\xi}\} &= h_r \{G_r(Z_i), \xi\} - \theta^T \frac{K_{r-1} \{G_r(Z_i), \psi\} \lambda_{r\psi} \{G_r(Z_i), \psi\}}{\lambda_r \{G_r(Z_i), \psi\}}, \\ \widetilde{q}_r \{G_r(Z_i), \widetilde{\xi}, \psi\} &= -[K_r \{G_r(Z_i), \psi\}]^{-1} \sum_{j=1}^r \frac{\lambda_j \{G_j(Z_i), \psi\}}{K_j \{G_j(Z_i), \psi\}} \begin{pmatrix} \widetilde{h}_{j\xi} \{G_j(Z_i), \widetilde{\xi}, \psi\} \\ \widetilde{h}_{j\theta} \{G_j(Z_i), \widetilde{\xi}, \psi\} \end{pmatrix}, \\ \widetilde{h}_{j\theta} \{G_j(Z_i), \widetilde{\xi}, \psi\} &= -K_{j-1} \{G_j(Z_i), \psi\} \lambda_{j\psi} \{G_j(Z_i), \psi\} / \lambda_j \{G_j(Z_i), \psi\}, \\ \widetilde{h}_{j\xi} \{G_j(Z_i), \widetilde{\xi}, \psi\} &= h_{j\xi} \{G_j(Z_i), \xi, \psi\}. \end{aligned}$$

The matrix  $A_i$  is given by

$$A_i = \begin{pmatrix} A_{1i} \\ A_{2i} \end{pmatrix}, \quad A_{1i} = \begin{pmatrix} D_{i,1} & 0 & \cdots & \cdots & \cdots & 0 \\ 0 & \ddots & 0 & \cdots & \cdots & 0 \\ 0 & 0 & D_{i,r} & 0 & \cdots & 0 \\ 0 & \cdots & 0 & \ddots & 0 & 0 \\ 0 & \cdots & \cdots & 0 & D_{i,M} & 0 \end{pmatrix},$$

and

$$A_{2i} = \begin{pmatrix} \partial / \partial \tau \{ \rho_{3,i}(\tau) \} \end{pmatrix},$$

where

$$D_{i,r} = -I(C_i \geq r) \lambda_r \{G_r(Z_i), \psi_r\} [1 - \lambda_r \{G_r(Z_i), \psi_r\}] \tilde{X}_{i,r}^T \tilde{X}_{i,r}, \quad r = 1, \dots, M,$$

$$\rho_{3,i}(\tau) = \left( \begin{array}{c} \sum_{r=1}^M I(C_i > r) \tilde{q}_r \{G_r(Z_i), \tilde{\xi}, \psi\} [\tilde{h}_{r+1} \{G_{r+1}(Z_i), \tilde{\xi}, \psi\} - \tilde{h}_r \{G_r(Z_i), \tilde{\xi}, \psi\}] \\ \frac{I(C_i = \infty) m(Z_i, \beta)}{\pi(\infty, Z_i, \psi)} + \sum_{r=1}^M \frac{dM_c \{r, G_r(Z_i), \psi\}}{K_r \{G_r(Z_i), \psi\}} h_r \{G_r(Z_i), \xi\} \end{array} \right).$$

Analogous to the strategy for  $\hat{\beta}_{br^*}$ , in our implementation, we used numerical derivatives as an approximation to the analytical derivatives of  $\rho_{3,i}(\tau)$  with respect to  $\tau$ .

## Web Appendix B: Derivation of Conditional Expectations Implied by Assumed Mixed Models in Section 5

We derive the required conditional expectations  $E(Y|Y_1, \dots, Y_j, \tilde{X})$  for  $j = 1, \dots, 4$  implied by model (17) in Section 5 of the main paper. The random vector  $\Psi = (\alpha_0, \alpha_1, e_1, e_2, e_3, e_4)^T$  has multivariate normal distribution with mean  $\mu$  and variance  $\Sigma$ , where

$$\mu = (\mu_{\alpha_0}, \mu_{\alpha_1}, 0_{1 \times 4})^T, \quad \Sigma = \begin{pmatrix} \Sigma_\alpha & 0_{2 \times 4} \\ 0_{4 \times 2} & \sigma_e^2 I_4 \end{pmatrix},$$

$0_{a \times b}$  is a zero matrix with dimension  $(a \times b)$ , and  $I_a$  is an  $(a \times a)$  identity matrix. Therefore, the distribution of  $(\alpha_0, \alpha_1, Y_1, Y_2, Y_3, Y_4)^T$ , conditional on  $\tilde{X}$ , follows multivariate normal distribution with mean  $\tilde{\mu} = A\mu + c$  and variance  $\tilde{\Sigma} = A\Sigma A^T$ , where

$$A = I_6 + \begin{pmatrix} 0_{2 \times 2} & 0_{2 \times 4} \\ A_{21} & 0_{4 \times 4} \end{pmatrix}, \quad A_{21} = \begin{pmatrix} 1 & 1 & 1 & 1 \\ t_1 & t_2 & t_3 & t_4 \end{pmatrix}^T, \quad \text{and} \quad c = \gamma^T \tilde{X} \begin{pmatrix} 0_{2 \times 1} \\ 1_{4 \times 1} \end{pmatrix}.$$

Hence, the conditional mean is given by

$$\begin{aligned} E(Y|Y_1, Y_2, Y_3, Y_4, \tilde{X}) &= E(Y_5|Y_1, Y_2, Y_3, Y_4, \tilde{X}) \\ &= \gamma^T X + E(\alpha_0|Y_1, Y_2, Y_3, Y_4, \tilde{X}) + t_5 E(\alpha_1|Y_1, Y_2, Y_3, Y_4, \tilde{X}). \end{aligned}$$

To calculate the conditional mean  $E(\alpha_k|Y_1, Y_2, Y_3, Y_4, \tilde{X})$ ,  $k = 0, 1$ , we use the following property of multivariate normal distribution. Suppose  $(X_1^T, X_2^T)^T$  follows a  $N(v, \Omega)$  distribution. If  $v$  and  $\Omega$  are partitioned correspondingly as follows:

$$v = \begin{pmatrix} v_1 \\ v_2 \end{pmatrix} \quad \text{and} \quad \Omega = \begin{pmatrix} \Omega_{11} & \Omega_{12} \\ \Omega_{21} & \Omega_{22} \end{pmatrix},$$

then  $(X_1|X_2 = a) \sim N(\bar{v}, \bar{\Omega})$ , where  $\bar{v} = v_1 + \Omega_{12}\Omega_{22}^{-1}(a - v_2)$ . Straightforward application of the above property yields

$$E\left\{(\alpha_0, \alpha_1)^T|Y_1, \dots, Y_4, \tilde{X}\right\} = \tilde{\mu}_{1:2} + \tilde{\Sigma}_{1:2,3:6}\tilde{\Sigma}_{3:6,3:6}^{-1}\{(Y_1, Y_2, Y_3, Y_4)^T - \tilde{\mu}_{3:6}\},$$

where  $\tilde{\mu}_{a:b}$  is a column vector consisting of  $a$ th to  $b$ th entries of  $\tilde{\mu}$ , and  $\tilde{\Sigma}_{a:b,m:n}$  is the submatrix of  $\tilde{\Sigma}$  with rows  $a$  to  $b$  and columns  $m$  to  $n$ . Therefore the conditional expectation is

$$E(Y|Y_1, Y_2, Y_3, Y_4, \tilde{X}) = \gamma^T \tilde{X} + (1, t_5) \left[ \tilde{\mu}_{1:2} + \tilde{\Sigma}_{1:2,3:6}\tilde{\Sigma}_{3:6,3:6}^{-1}\{(Y_1, Y_2, Y_3, Y_4)^T - \tilde{\mu}_{3:6}\} \right].$$

Similarly,

$$\begin{aligned} E(Y|Y_1, Y_2, Y_3, \tilde{X}) &= \gamma^T \tilde{X} + (1, t_5) \left[ \tilde{\mu}_{1:2} + \tilde{\Sigma}_{1:2,3:5}\tilde{\Sigma}_{3:5,3:5}^{-1}\{(Y_1, Y_2, Y_3)^T - \tilde{\mu}_{3:5}\} \right], \\ E(Y|Y_1, Y_2, \tilde{X}) &= \gamma^T \tilde{X} + (1, t_5) \left[ \tilde{\mu}_{1:2} + \tilde{\Sigma}_{1:2,3:4}\tilde{\Sigma}_{3:4,3:4}^{-1}\{(Y_1, Y_2)^T - \tilde{\mu}_{3:4}\} \right], \\ E(Y|Y_1, \tilde{X}) &= \gamma^T \tilde{X} + (1, t_5) \left\{ \tilde{\mu}_{1:2} + \tilde{\Sigma}_{1:2,3:3}\tilde{\Sigma}_{3:3,3:3}^{-1}(Y_1 - \tilde{\mu}_{3:3}) \right\}. \end{aligned}$$

Next, we provide the derivation of the conditional expectations

$$E(Y|Y_1, \dots, Y_j, \tilde{X}, \text{dis}_1, \text{dis}_2, \text{dis}_3, \text{dis}_4)$$

for  $j = 1, \dots, 4$  implied by assumed linear mixed model used in the second, general coarsened data analysis in Section 5 of the main paper; i.e., we assumed that, for  $r = 1, \dots, 5$ , the data follow the linear mixed model

$$Y_{ir} = \alpha_{0i} + \alpha_{1i}t_{ir} + \gamma^T \tilde{X}_i + \phi_1 I(r \geq 3)\text{dis}_{i2} + \phi_2 I(r = 5)\text{dis}_{i4} + e_{ir},$$

where the random effects and within-subject deviations are normal as above, and now  $\tilde{X} = (\text{weight}, \text{karnof}, \text{symp})$ .

Following the same logic as above, the distribution of  $(\alpha_0, \alpha_1, Y_1, Y_2, Y_3, Y_4)^T$ , conditional on  $(\tilde{X}, \text{dis}_1, \text{dis}_2, \text{dis}_3, \text{dis}_4)$ , follows multivariate normal distribution with mean  $\tilde{\mu}^* = A\mu + \tilde{c}$  and variance  $\tilde{\Sigma} = A\Sigma A^T$ , where  $A, \mu, \Sigma, \tilde{\Sigma}$  are the same as above, and

$$\tilde{c} = \left( 0_{1 \times 2}, \gamma^T \tilde{X}, \gamma^T \tilde{X}, \gamma^T \tilde{X} + \phi_1 \text{dis}_2, \gamma^T \tilde{X} + \phi_1 \text{dis}_2 \right)^T.$$

The conditional expectations are given as follows:

$$\begin{aligned} & E(Y|Y_1, Y_2, Y_3, Y_4, \tilde{X}, \text{dis}_1, \text{dis}_2, \text{dis}_3, \text{dis}_4) \\ &= \gamma^T \tilde{X} + \phi_1 \text{dis}_2 + \phi_2 \text{dis}_4 + (1, t_5) \left[ \tilde{\mu}_{1:2}^* + \tilde{\Sigma}_{1:2,3:6}^{-1} \tilde{\Sigma}_{3:6,3:6}^{-1} \{(Y_1, Y_2, Y_3, Y_4)^T - \tilde{\mu}_{3:6}^*\} \right], \\ & E(Y|Y_1, Y_2, Y_3, \tilde{X}, \text{dis}_1, \text{dis}_2, \text{dis}_3, \text{dis}_4) \\ &= \gamma^T \tilde{X} + \phi_1 \text{dis}_2 + \phi_2 \text{dis}_4 + (1, t_5) \left[ \tilde{\mu}_{1:2}^* + \tilde{\Sigma}_{1:2,3:5}^{-1} \tilde{\Sigma}_{3:5,3:5}^{-1} \{(Y_1, Y_2, Y_3)^T - \tilde{\mu}_{3:5}^*\} \right], \\ & E(Y|Y_1, Y_2, \tilde{X}, \text{dis}_1, \text{dis}_2, \text{dis}_3, \text{dis}_4) \\ &= \gamma^T \tilde{X} + \phi_1 \text{dis}_2 + \phi_2 \text{dis}_4 + (1, t_5) \left[ \tilde{\mu}_{1:2}^* + \tilde{\Sigma}_{1:2,3:4}^{-1} \tilde{\Sigma}_{3:4,3:4}^{-1} \{(Y_1, Y_2)^T - \tilde{\mu}_{3:4}^*\} \right], \\ & E(Y|Y_1, \tilde{X}, \text{dis}_1, \text{dis}_2, \text{dis}_3, \text{dis}_4) \\ &= \gamma^T \tilde{X} + \phi_1 \text{dis}_2 + \phi_2 \text{dis}_4 + (1, t_5) \left\{ \tilde{\mu}_{1:2}^* + \tilde{\Sigma}_{1:2,3:3}^{-1} \tilde{\Sigma}_{3:3,3:3}^{-1} (Y_1 - \tilde{\mu}_{3:3}^*) \right\}. \end{aligned}$$

## Web Appendix C: Derivation of Conditional Expectations Implied by Assumed Mixed Model in Section 6

We derive the required conditional expectations  $E(Y|\bar{L}_j)$  for  $j = 1, 2$  implied by the model used in Section 6 of the main paper. The model implies that, in truth,

$$E(Y|\bar{L}_2) = E\{E(Y|\bar{L}_2, \alpha_0, \alpha_1)|\bar{L}_2\} = \gamma^T X + \mu_1(X, Y_1, Y_2) + t_3 \mu_2(X, Y_1, Y_2),$$

where  $\mu_1(X, Y_1, Y_2) = E(\alpha_0|X, Y_1, Y_2)$ , and  $\mu_2(X, Y_1, Y_2) = E(\alpha_1|X, Y_1, Y_2)$ .



Thus, we need to calculate the conditional distribution of  $\alpha_0, \alpha_1$  given  $X, Y_1, Y_2$ . The joint density of  $(\alpha_0, \alpha_1, X, Y_1, Y_2)^T$  is given by

$$f(\alpha_0, \alpha_1, X, Y_1, Y_2) = f(Y_2|\alpha_0, \alpha_1, X, Y_1)f(Y_1|\alpha_0, \alpha_1, X)f(X)f(\alpha_0, \alpha_1)$$

Therefore,

$$\begin{aligned} f(\alpha_0, \alpha_1|X, Y_1, Y_2) &= \frac{f(\alpha_0, \alpha_1, X, Y_1, Y_2)}{\int f(\alpha_0, \alpha_1, X, Y_1, Y_2)d\alpha_0d\alpha_1} \\ &= \frac{f(Y_2|\alpha_0, \alpha_1, X, Y_1)f(Y_1|\alpha_0, \alpha_1, X)f(\alpha_0, \alpha_1)}{\int f(Y_2|\alpha_0, \alpha_1, X, Y_1)f(Y_1|\alpha_0, \alpha_1, X)f(\alpha_0, \alpha_1)d\alpha_0d\alpha_1}. \end{aligned}$$

As a consequence,

$$f(\alpha_0, \alpha_1|X, Y_1, Y_2) \propto f(Y_2|\alpha_0, \alpha_1, X, Y_1)f(Y_1|\alpha_0, \alpha_1, X)f(\alpha_0, \alpha_1).$$

After some algebra, it can be shown that, if we let  $a = \sigma_{22}/(\sigma_{11}\sigma_{22} - \sigma_{12}^2)$ ,  $b = -\sigma_{12}/(\sigma_{11}\sigma_{22} - \sigma_{12}^2)$ ,  $c = \sigma_{11}/(\sigma_{11}\sigma_{22} - \sigma_{12}^2)$ ,  $g_1(X, Y_1, Y_2) = a\mu_{\alpha_0} + b\mu_{\alpha_1} + (Y_2 + Y_1 - 2\gamma^T X)/\sigma_e^2$ , and  $g_2(X, Y_1, Y_2) = b\mu_{\alpha_0} + c\mu_{\alpha_1} + (Y_2 - \gamma^T X)/\sigma_e^2$ , then

$$\begin{aligned} \mu_2(X, Y_1, Y_2) &= E(\alpha_1|Z, Y_1, Y_2) = \frac{g_1(X, Y_1, Y_2)(b + 1/\sigma_e^2) - g_2(X, Y_1, Y_2)(a + 2/\sigma_e^2)}{(b + 1/\sigma_e^2)^2 - (c + 1/\sigma_e^2)(a + 2/\sigma_e^2)}, \\ \mu_1(X, Y_1, Y_2) &= E(\alpha_0|Z, Y_1, Y_2) = \frac{g_2(X, Y_1, Y_2) - \mu_2(X, Y_1, Y_2)(c + 1/\sigma_e^2)}{b + 1/\sigma_e^2}. \end{aligned}$$

Similarly, we have

$$E(Y|\bar{L}_1) = E\{E(Y|\bar{L}_1, \alpha_0, \alpha_1)|\bar{L}_1\} = \gamma^T X + \mu_3(X, Y_1) + t_3\mu_4(X, Y_1),$$

where  $\mu_3(X, Y_1) = E(\alpha_0|X, Y_1)$ , and  $\mu_4(X, Y_1) = E(\alpha_1|X, Y_1)$ . Letting  $d = b\mu_{\alpha_0} + c\mu_{\alpha_1}$ ,  $g_3(X, Y_1) = a\mu_{\alpha_0} + b\mu_{\alpha_1} + (Y_1 - \gamma^T X)/\sigma_e^2$ , we have

$$\begin{aligned} \mu_3(X, Y_1) &= E(\alpha_0|X, Y_1) = \frac{g_3(X, Y_1) \cdot c - d \cdot b}{(a + 1/\sigma_e^2)c - b^2}, \\ \mu_4(X, Y_1) &= E(\alpha_1|X, Y_1) = \frac{d - \mu_3(X, Y_1) \cdot b}{c}. \end{aligned}$$
